# Supplementary material for: Clinical characteristics and prognosis of patients with glioblastoma: A review of survival analysis of 1674 patients based on SEER database
Source: PubMed Central journal article supplement (PMC9704894; doi:10.1097/md.0000000000032042), 2022-11-25
Supplement: medi-101-e32042-s001.pdf [file medi-101-e32042-s001.pdf]

**Supplemental Table 1: Distribution of cause of death.**

| <b>Reasons of death</b>                                 | <b>No.</b> | <b>Percentage</b> |
|---------------------------------------------------------|------------|-------------------|
| Accidents and Adverse Effects                           | 4          | 0.2%              |
| Aleukemic, Subleukemic and NOS                          | 2          | 0.1%              |
| Alive                                                   | 119        | 7.1%              |
| Atherosclerosis                                         | 1          | 0.1%              |
| Brain and Other Nervous System                          | 1251       | 74.7%             |
| Breast                                                  | 17         | 1.0%              |
| Cerebrovascular Diseases                                | 9          | 0.5%              |
| Chronic Lymphocytic Leukemia                            | 2          | 0.1%              |
| Chronic Obstructive Pulmonary Disease and Allied Cond   | 5          | 0.3%              |
| Colon excluding Rectum                                  | 11         | 0.7%              |
| Diabetes Mellitus                                       | 4          | 0.2%              |
| Diseases of Heart                                       | 19         | 1.1%              |
| Esophagus                                               | 1          | 0.1%              |
| Hodgkin Lymphoma                                        | 1          | 0.1%              |
| In situ, benign or unknown behavior neoplasm            | 78         | 4.7%              |
| Kidney and Renal Pelvis                                 | 4          | 0.2%              |
| Liver                                                   | 1          | 0.1%              |
| Lung and Bronchus                                       | 21         | 1.3%              |
| Melanoma of the Skin                                    | 4          | 0.2%              |
| Miscellaneous Malignant Cancer                          | 33         | 2.0%              |
| Non-Hodgkin Lymphoma                                    | 2          | 0.1%              |
| Oropharynx                                              | 1          | 0.1%              |
| Other Cause of Death                                    | 22         | 1.3%              |
| Other Digestive Organs                                  | 1          | 0.1%              |
| Other Diseases of Arteries, Arterioles, Capillaries     | 1          | 0.1%              |
| Other Infectious and Parasitic Diseases including HIV   | 7          | 0.4%              |
| Other Myeloid/Monocytic Leukemia                        | 1          | 0.1%              |
| Ovary                                                   | 4          | 0.2%              |
| Pancreas                                                | 1          | 0.1%              |
| Pneumonia and Influenza                                 | 9          | 0.5%              |
| Prostate                                                | 14         | 0.8%              |
| Rectum and Rectosigmoid Junction                        | 2          | 0.1%              |
| Septicemia                                              | 2          | 0.1%              |
| State DC not available or state DC available but no COD | 7          | 0.4%              |
| Stomach                                                 | 2          | 0.1%              |
| Symptoms, Signs and Ill-Defined Conditions              | 1          | 0.1%              |
| Thyroid                                                 | 4          | 0.2%              |
| Urinary Bladder                                         | 6          | 0.4%              |
| Total                                                   | 1674       | 100.0             |
